# Supplementary material for: Nucleation of α-pinene oxidation products with sulfuric acid
Source: Royal Society of Chemistry journal article supplement (doi:10.1039/d6ea00046k), 2026-06-09

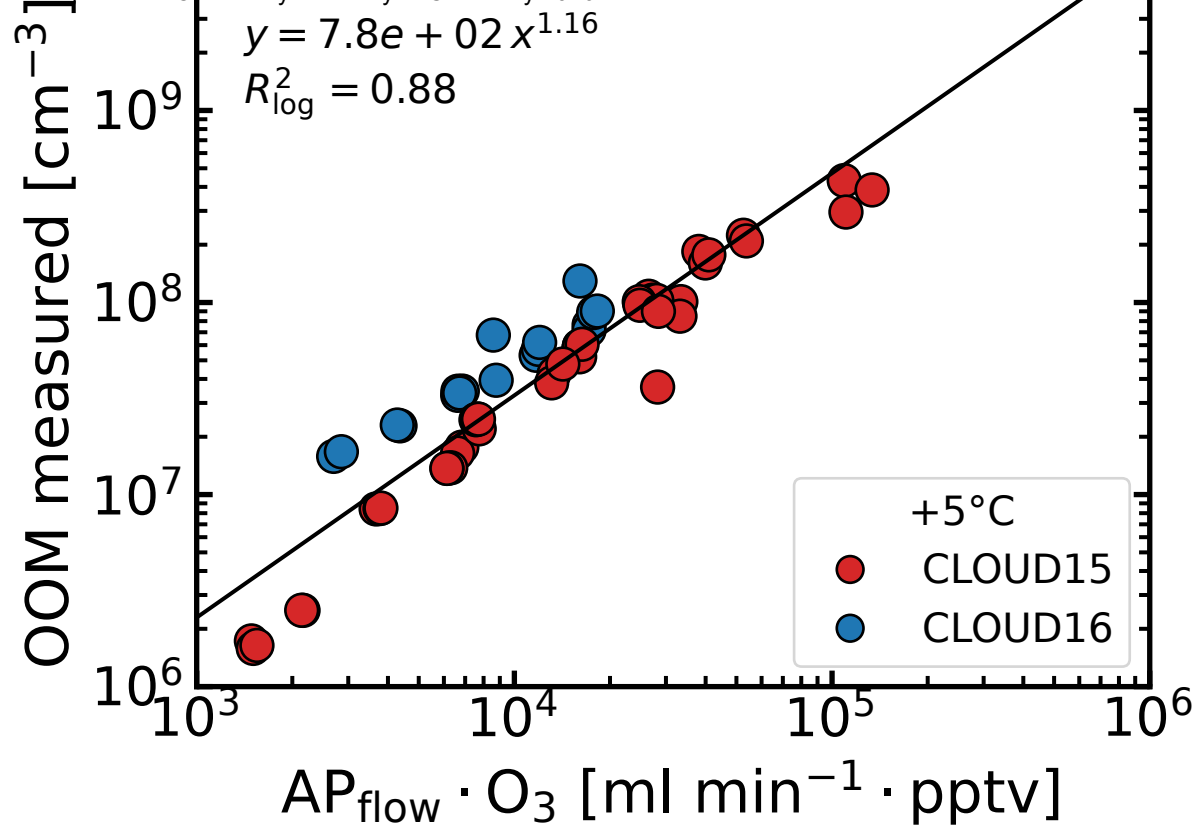

Supplement: d6ea00046k3.pdf [file d6ea00046k3.pdf]
