# Supplementary figures and images for: Nucleation of α-pinene oxidation products with sulfuric acid
Source: Royal Society of Chemistry journal article supplement (doi:10.1039/d6ea00046k), 2026-06-09

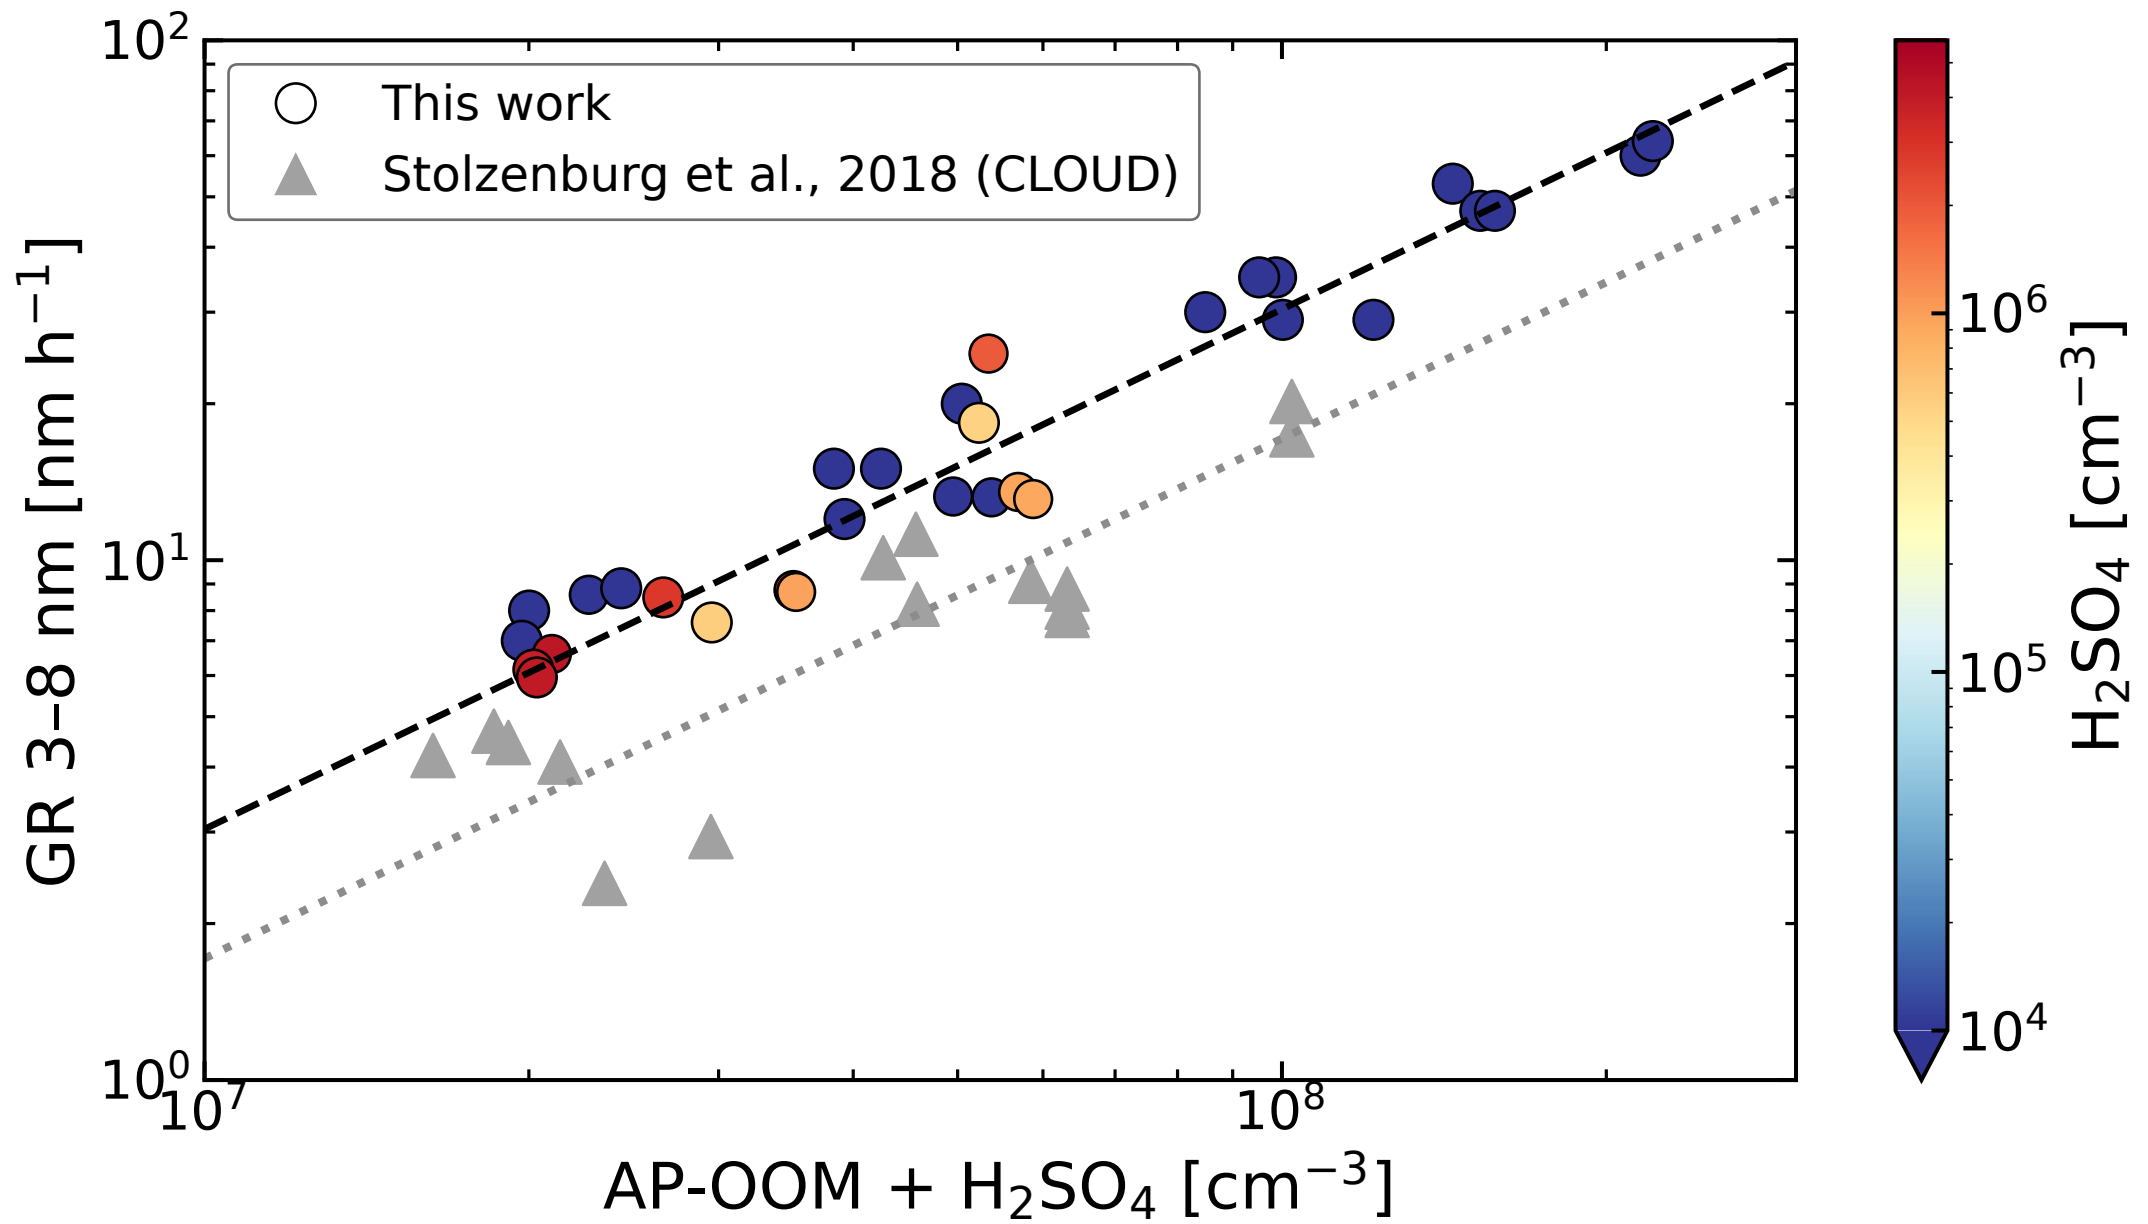

Supplement: d6ea00046k7.zip [file SI_GRs_forced_origin.pdf › SI Figures/SI_GRs_forced_origin.pdf]

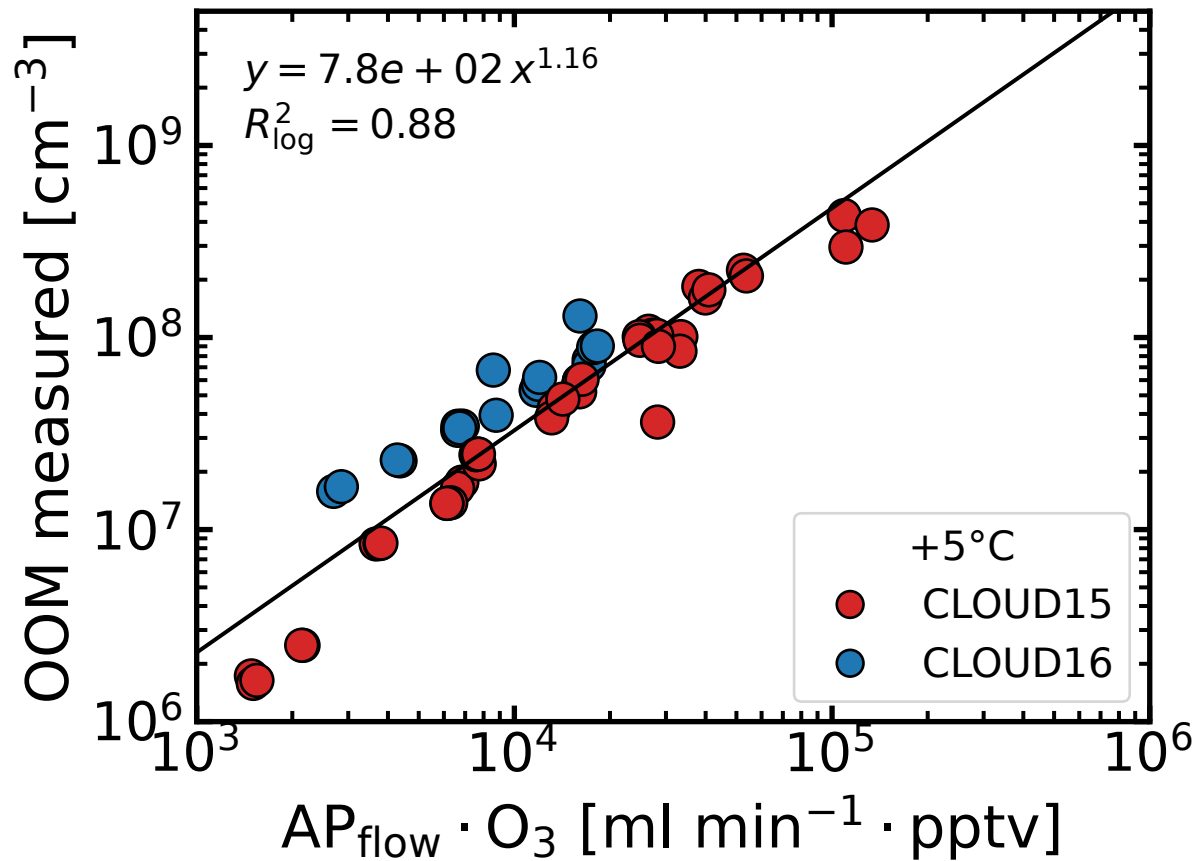

Supplement: d6ea00046k7.zip [file SI_fig_APcalc_O3_vs_OOM.pdf › SI Figures/SI_fig_APcalc_O3_vs_OOM.pdf]

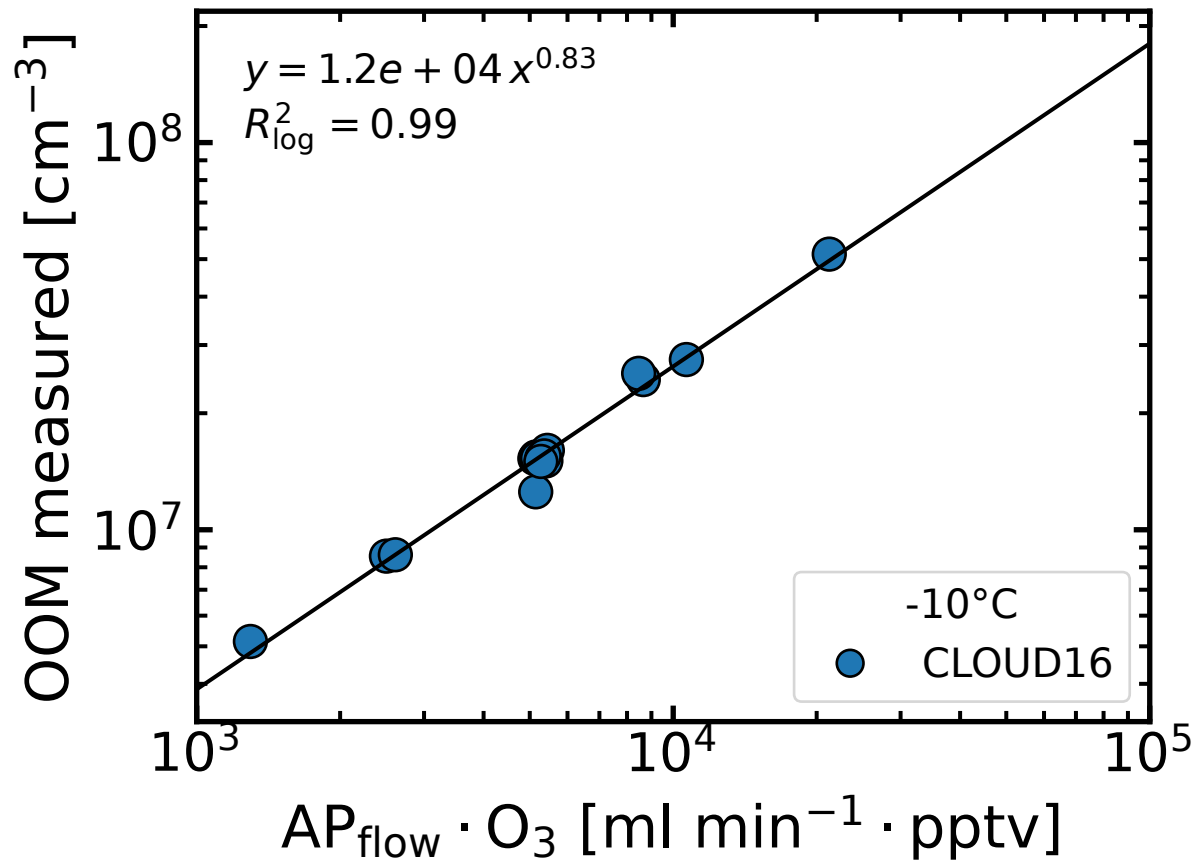

Supplement: d6ea00046k7.zip [file SI_fig_APcalc_O3_vs_OOM_min10.pdf › SI Figures/SI_fig_APcalc_O3_vs_OOM_min10.pdf]

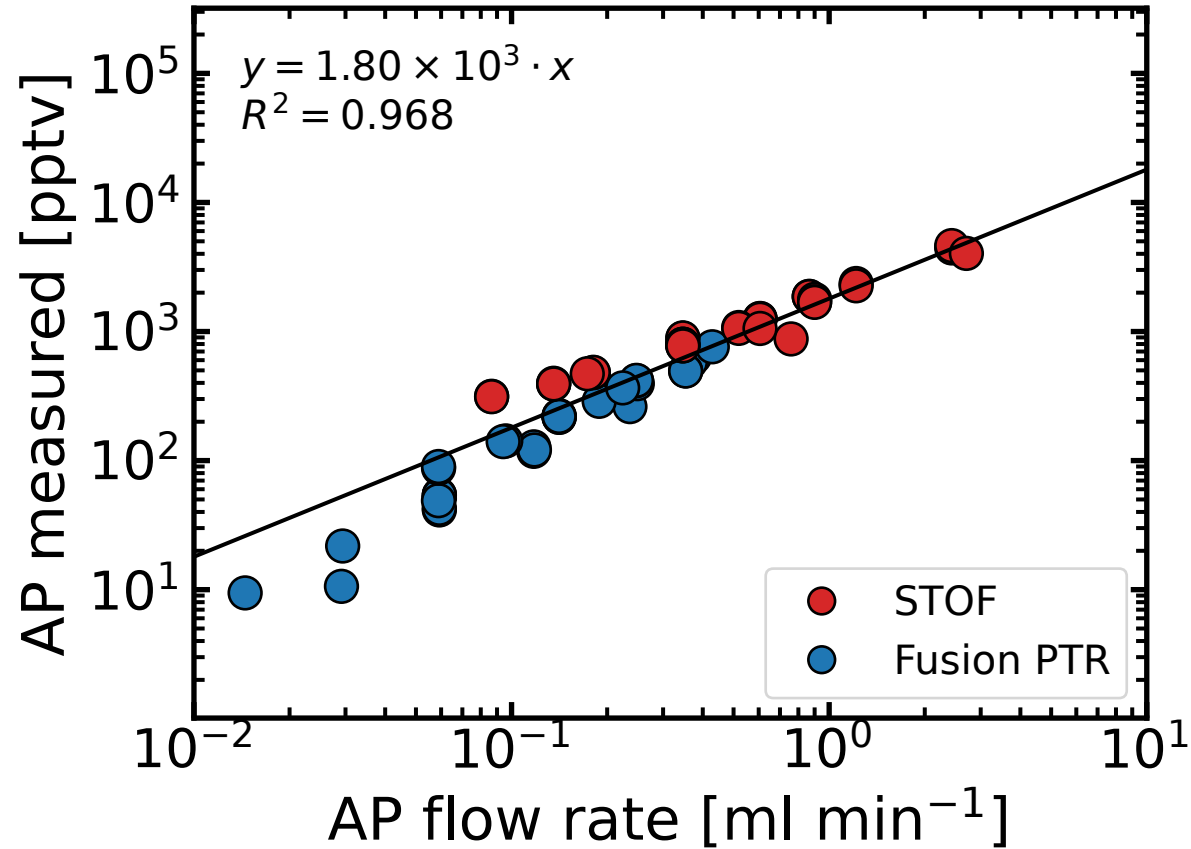

Supplement: d6ea00046k7.zip [file SI_fig_APmfc_vs_APmeas.pdf › SI Figures/SI_fig_APmfc_vs_APmeas.pdf]

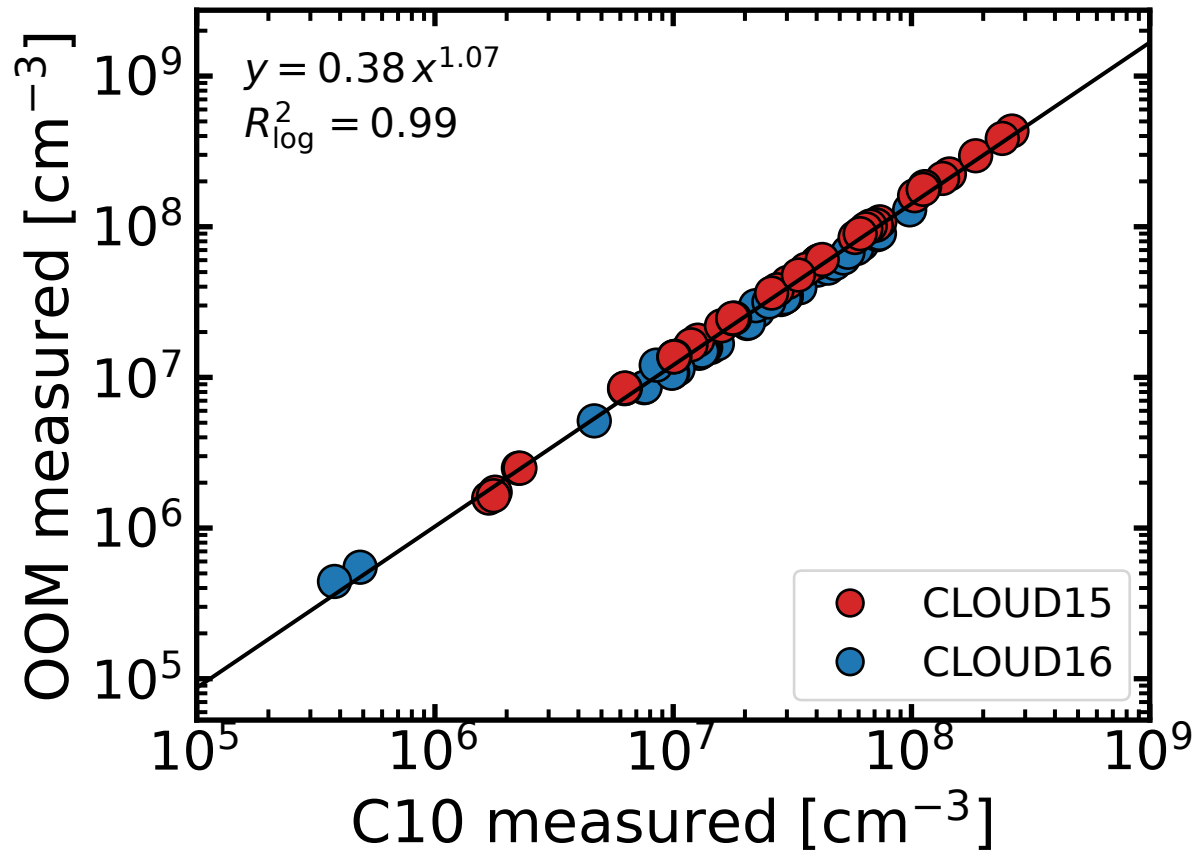

Supplement: d6ea00046k7.zip [file SI_fig_OOM_vs_C10.pdf › SI Figures/SI_fig_OOM_vs_C10.pdf]
